# Supplementary material
Source: PubMed Central journal article supplement (PMC2919129)
Supplement: supp_M109.092569_jbc.M109.092569-1.pdf [file supp_M109.092569_jbc.M109.092569-1.pdf]

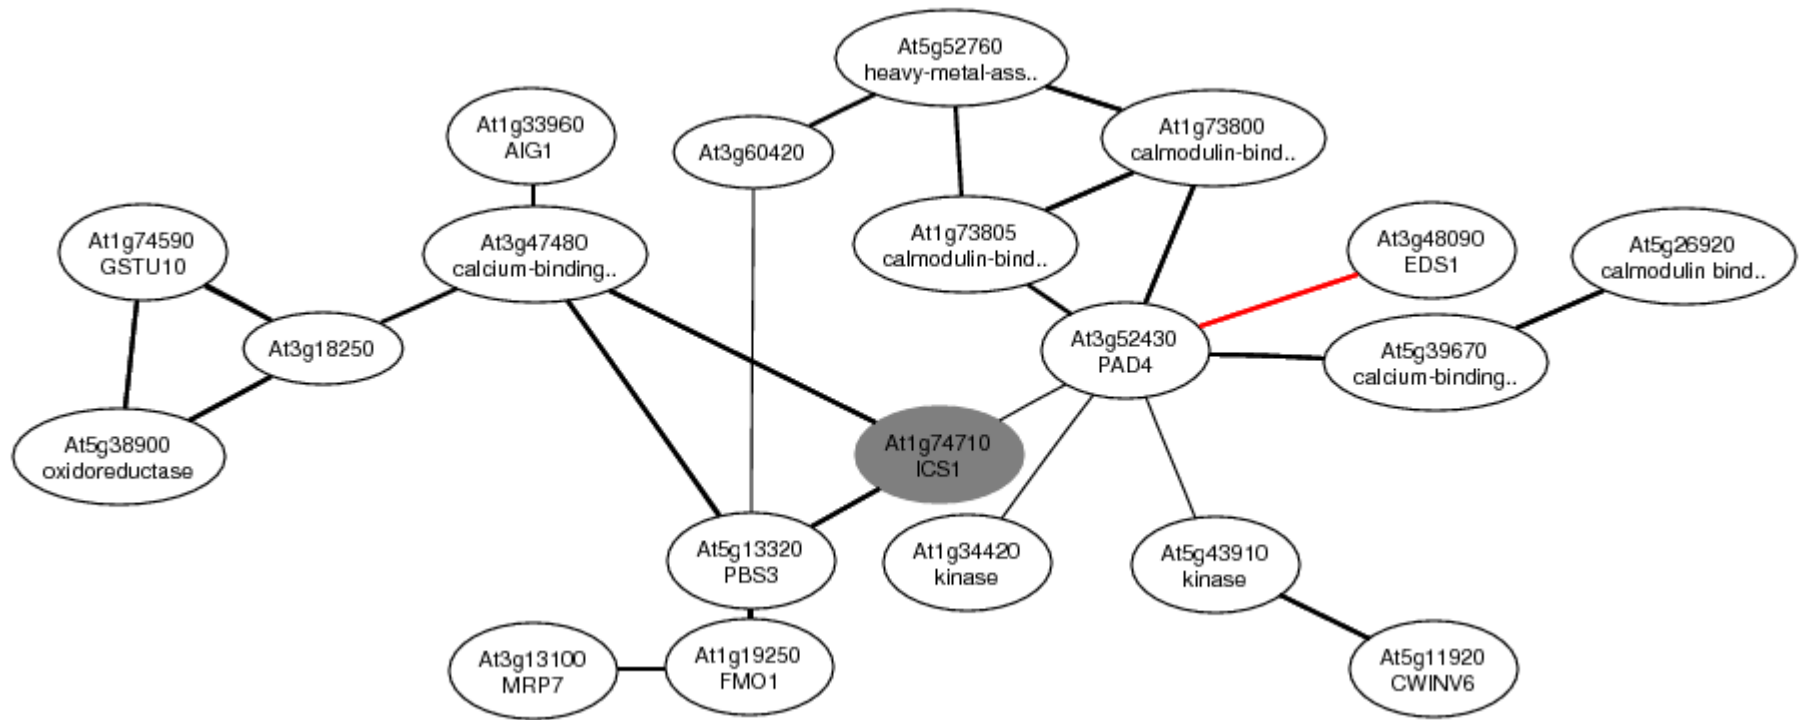

**Supplemental Figure S1. Co-expressed gene network around the SA synthesis gene Isochorismate synthase (ICS, At1g74710).**

Co-expression analysis performed with the ATTED-II trans-factor and cis-element prediction database (Obayashi et al. 2007) revealed that *ICS1* expression is correlated with the expression of the defence regulator *PAD4*, *EDS1* and *FMO1*. Co-expressed gene networks in ATTED-II are drawn based on rank of correlation. The averaged rank is represented in the line thickness: 1 ~ 5 bold lines; 5 ~ 30 normal lines, 30 ~ 50 weak lines. Red line indicates protein-protein interaction.

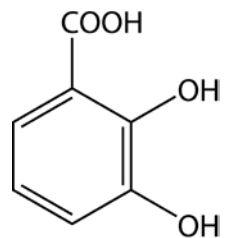

2,3-DHBA  
standard

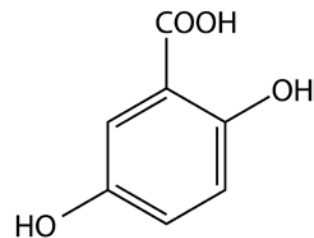

2,5-DHBA  
standard

Col-0 wild-type

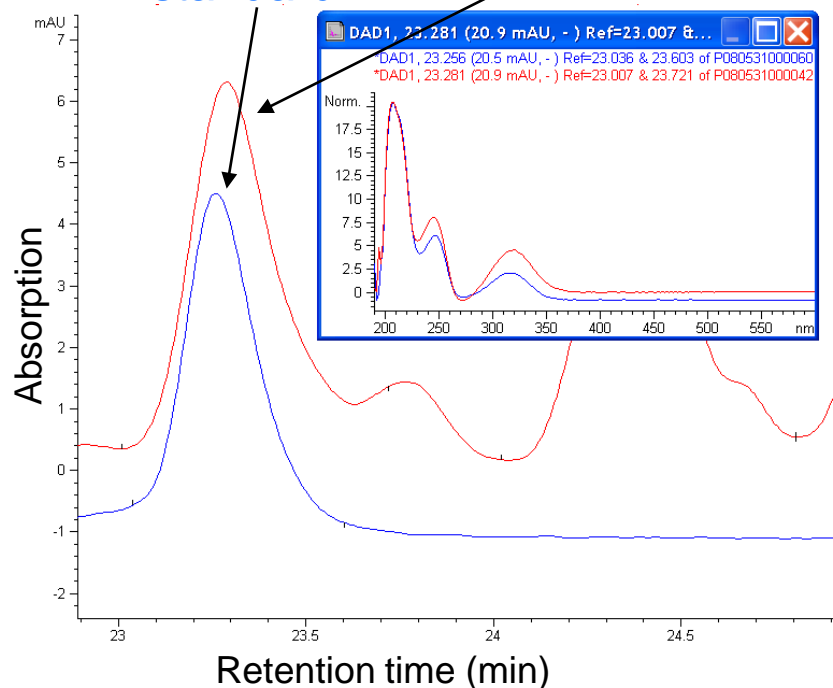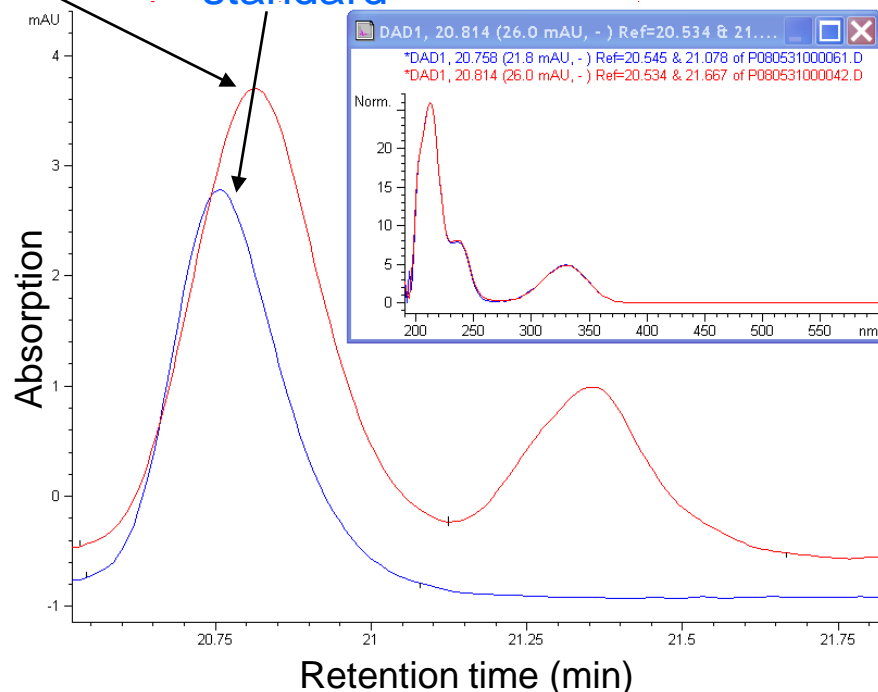

**Supplemental Figure S2. HPLC chromatograms and UV-absorption spectra from Arabidopsis leaf extracts and standard compounds 2,3- and 2,5-dihydroxybenzoic acid (DHBA).**

By comparing retention times and UV-absorption spectra of the unknown compound from leaf extracts (after  $\beta$ -glucosidase hydrolysis, red line) with DHBA standards (blue line) the peaks from the leaf extracts were identified as 2,3- and 2,5-DHBA. Absorption chromatograms were generated at 254 nm for 2,3-DHBA and at 320 nm for 2,5-DHBA.

**<sup>1</sup>H NMR** (500 MHz, MeOH-*d*<sub>4</sub>): δ 7.83 (1H, dd, *J* = 8.1, 8.1 Hz, H-5), 7.57 (1H, dd, *J* = 8.1, 1.6 Hz, H-6), 7.30 (1H, dd, *J* = 8.1, 1.6 Hz, H-4), 4.88 (1H, d, *J* = 7.3 Hz, H-1'), 3.92 (1H, dd, *J* = 11.5, 5.3 Hz, H-5'<sub>eq</sub>), 3.58 (1H, ddd, *J* = 9.9, 8.5, 5.3 Hz, H-4'), 3.51 (1H, dd, *J* = 9.0, 7.3 Hz, H-2'), 3.43 (1H, dd, *J* = 9.0, 8.5 Hz, H-3'), 3.32 (1H, dd, *J* = 11.5, 9.9 Hz, H-5'<sub>ax</sub>).

**<sup>13</sup>C NMR** (125 MHz, MeOH-*d*<sub>4</sub>): δ 173.0 (COOH), 153.2 (C-2), 146.2 (C-3), 124.7 (C-6), 123.3 (C-4), 119.0 (C-5), 114.2 (C-6), 103.2 (C-1'), 76.8 (C-3'), 74.2 (C-2'), 76.8 (C-3'), 70.5 (C-4'), 66.4 (C-5').

**Supplemental Figure S3. Structural elucidation of 2,3-DHBA 3-O-β-D-xyloside (2,3-DHB3X) by NMR analyses.**

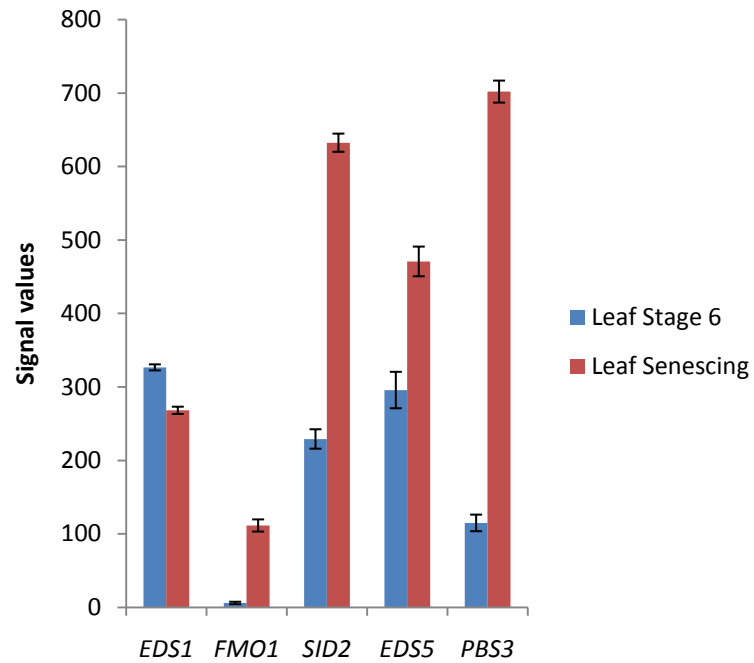

**Supplemental Figure S4. EDS1 and co-regulated genes expression in non-senescing (Leaf stage 6) and senescing leaves.** Raw signal expression values are taken from supplemental data of Wagstaff et al. 2008. Bars represent standard errors.

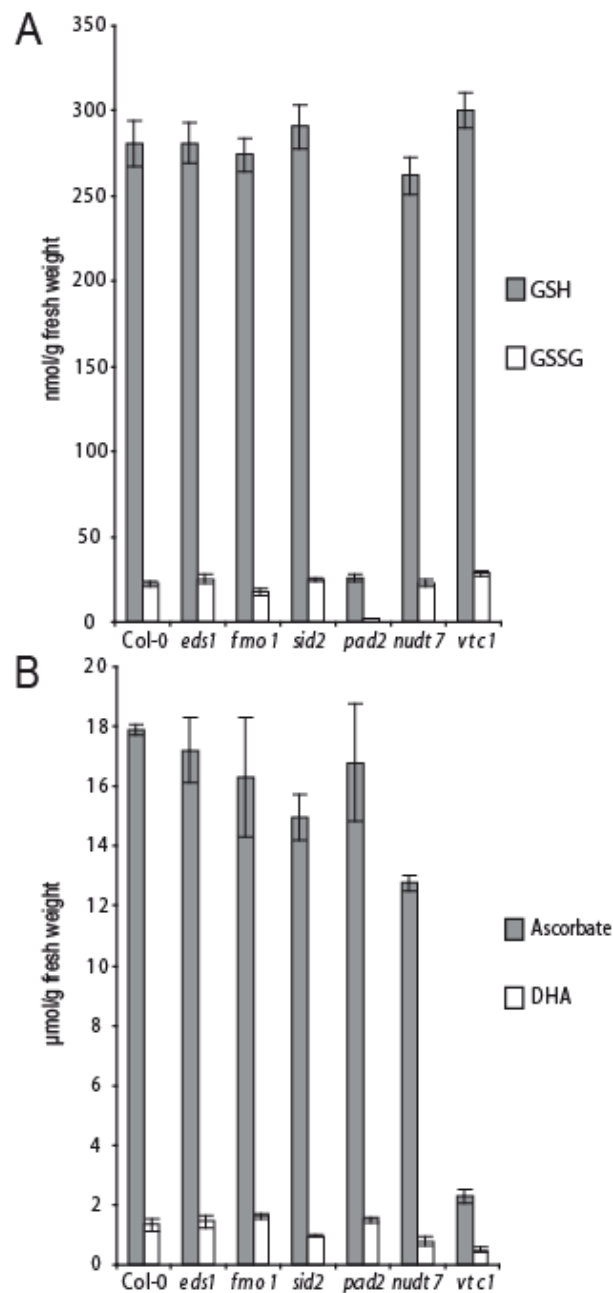

**Supplemental Figure S5.** Redox active compounds in *Arabidopsis* mutant aerial tissues.

Reduced and oxidized forms of (A) glutathione and (B) ascorbate were determined in triplicate samples derived from 8-week-old plants.

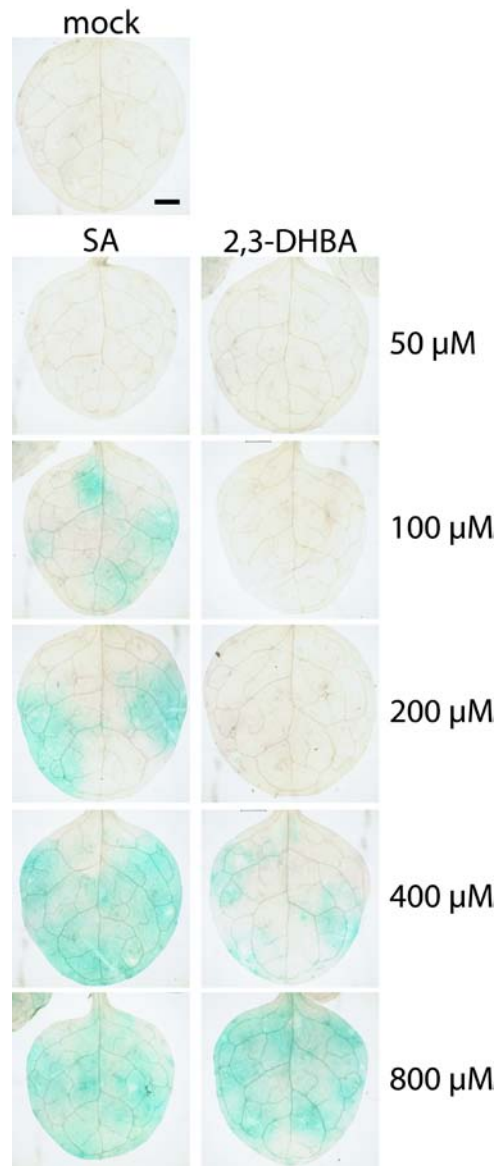

**Supplemental Figure S6. Exogenously applied 2,3-DHBA is a poor inducer of *PR1* expression compared to SA.**

3-week-old plants of the transgenic line Col-0:PR1/GUS were sprayed with salicylic acid (SA) or 2,3-dihydroxybenzoic acid (2,3-DHBA) at the indicated concentrations in 10 mM MgCl<sub>2</sub> with 0.005% Silwet L-77 or with MgCl<sub>2</sub>/ 0.005% Silwet L-77 alone (mock). Leaves were harvested 24 h after treatment and stained for  $\beta$ -glucuronidase (GUS) activity. The experiment was performed twice with similar results. Representative pictures are shown. Bar= 500  $\mu\text{m}$ .

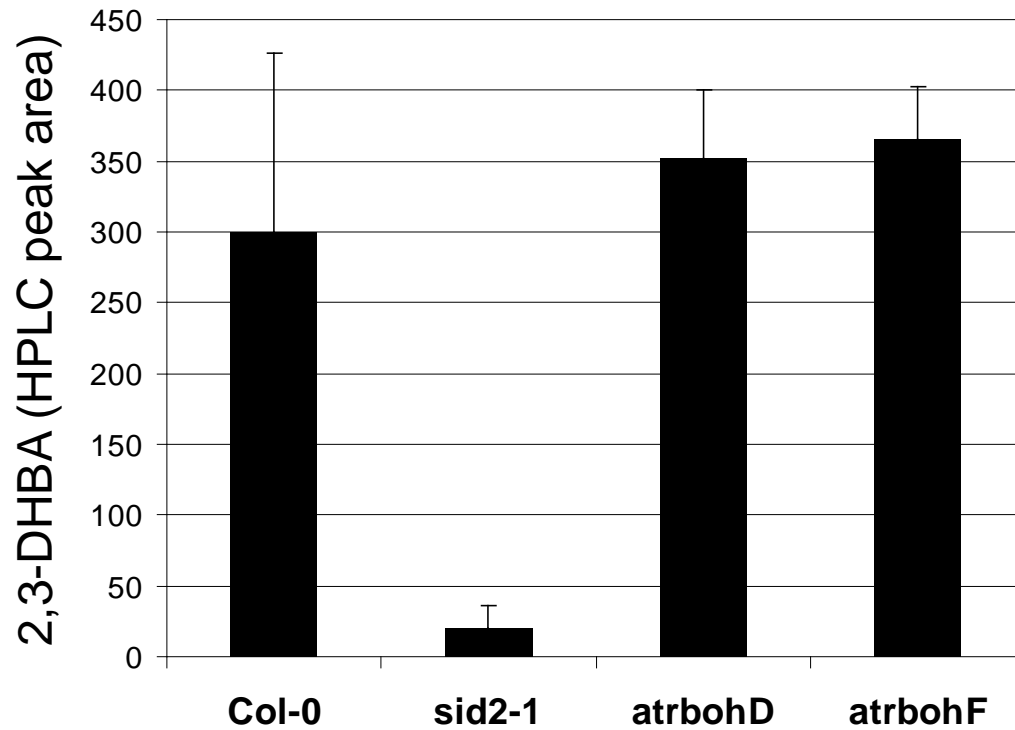

**Supplemental Figure S7.** Absolute levels of 2,3-DHBA are not altered in *atrbohD* or *atrbohF* mutants that are defective in pathogen induced hydrogen peroxide generation.

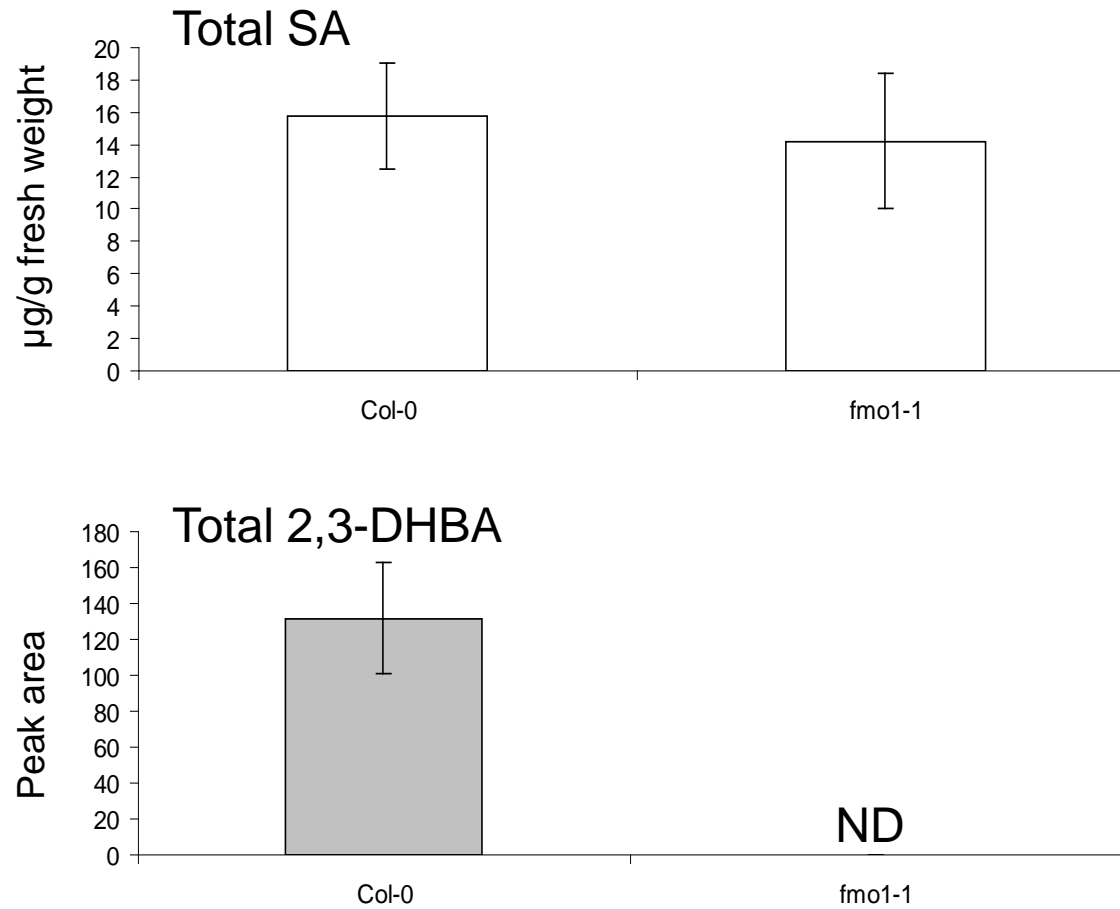

**Supplemental Figure S8.** 2,3-DHBA but not SA is absent in *fmo1-1* 24 hpi with Pst DC3000 avrRpm1 as determined by HPLC. ND = not detectable.



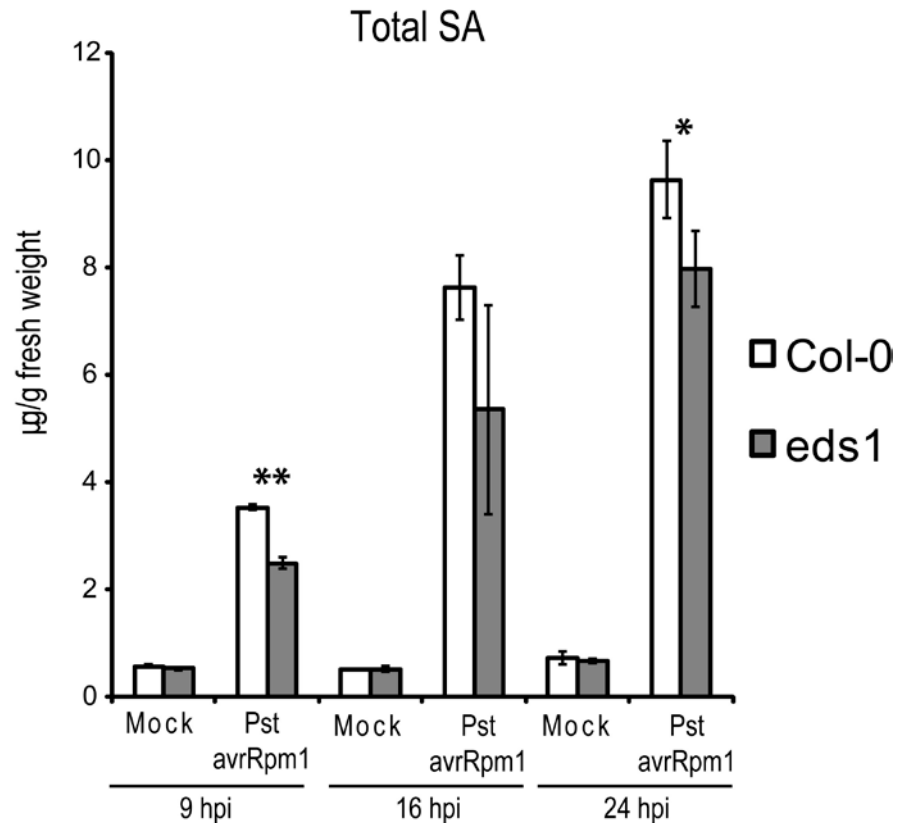

**Supplemental Figure S9.** Total SA accumulation in wild-type and *eds1* at early timepoints after infiltration with *Pst* DC3000/*avrRpm1* or mock treatment (10 mM MgCl<sub>2</sub>). SA levels were significantly different in Col-0 compared to *eds1* at \*  $P < 0,05$  and \*\*  $P < 0.01$  .
